# Supplementary material for: Replication stalling activates SSB for recruitment of DNA damage tolerance factors
Source: PubMed Central journal article supplement — Proc Natl Acad Sci U S A. 2022 Oct 3;119(41):e2208875119. doi: 10.1073/pnas.2208875119 (PMC9565051; doi:10.1073/pnas.2208875119), 2022-10-03
Supplement: pnas.2208875119.sapp.pdf [file pnas.2208875119.sapp.pdf]

## **SUPPLEMENTARY INFORMATION**

### **This PDF file includes:**

Figures S1 to S8

Tables S1 to S14

Supplementary Methods

Supplementary References

## Supplementary Figures

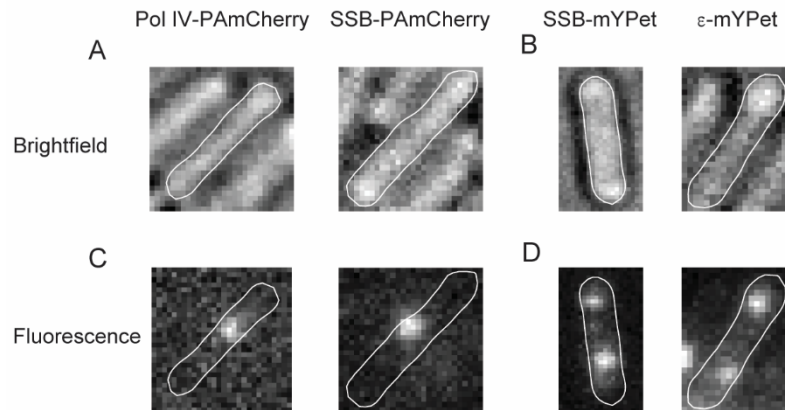

**Fig. S1.** Particle-tracking PALM imaging of Pol IV-PAmCherry and SSB-PAmCherry molecules and standard near-TIRF fluorescence imaging of SSB-mYPet and Pol III  $\epsilon$ -mYPet foci. Representative brightfield micrographs of cells containing (A) PAmCherry (*pamcherry1*) fusions to the endogenous copy of the Pol IV gene *dinB* (left) or a second copy of the single-stranded DNA-binding protein gene *ssb* at the *lacZ* locus (right) and (B) mYPet (*mypet*) fusions to a second copy of *ssb* at the *lacZ* locus (left) or the endogenous copy of the  $\epsilon$  subunit of Pol III *dnaQ* (right). Representative fluorescence micrographs of (C) single activated Pol IV-PAmCherry (left) or SSB-PAmCherry (right) molecules and (D) SSB-mYPet (left) and  $\epsilon$ -mYPet (right) foci recorded with 250 ms integration times with overlays of the cell outlines.

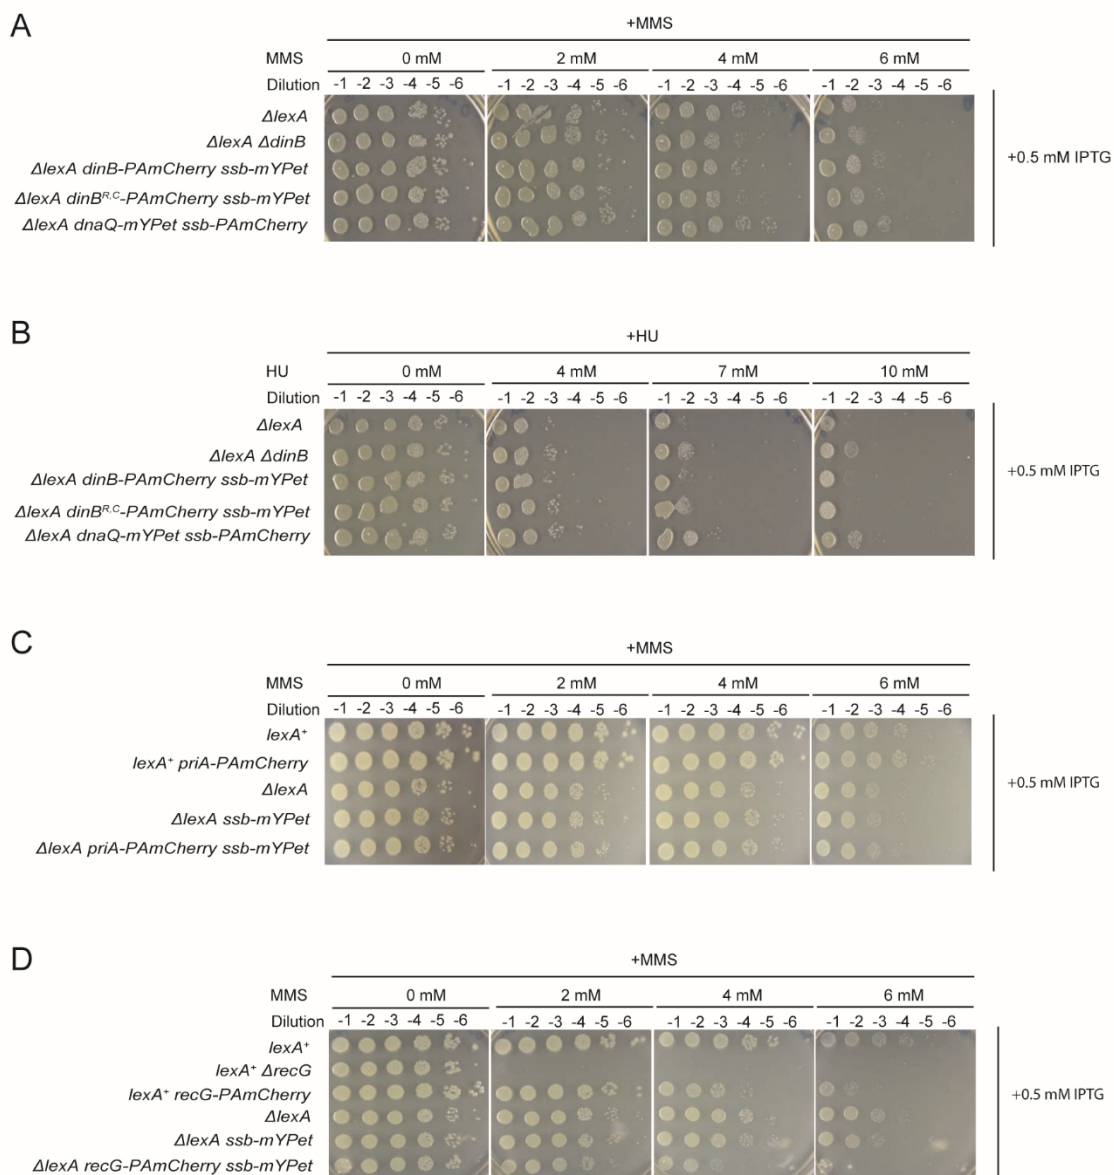

**Fig. S2.** (A) Serial 10-fold dilutions of *E. coli* strains with mutants and fusions to Pol IV (*dinB*) grown on LB agar plates with and without methyl methanesulfonate (MMS) added at 0, 2, 4, and 6  $\mu$ M concentration. (B) Serial 10-fold dilutions of *E. coli* strains with mutants and fusions to Pol IV (*dinB*) grown on LB agar plates with and without hydroxyurea (HU) added at 0, 4, 7, and 10  $\mu$ M concentration. Serial 10-fold dilutions of *E. coli* strains with fusions to (C) PriA (*priA*) or (D) RecG (*recG*) grown on LB agar plates with and without MMS added at 0, 2, 4, and 6 mM concentration.

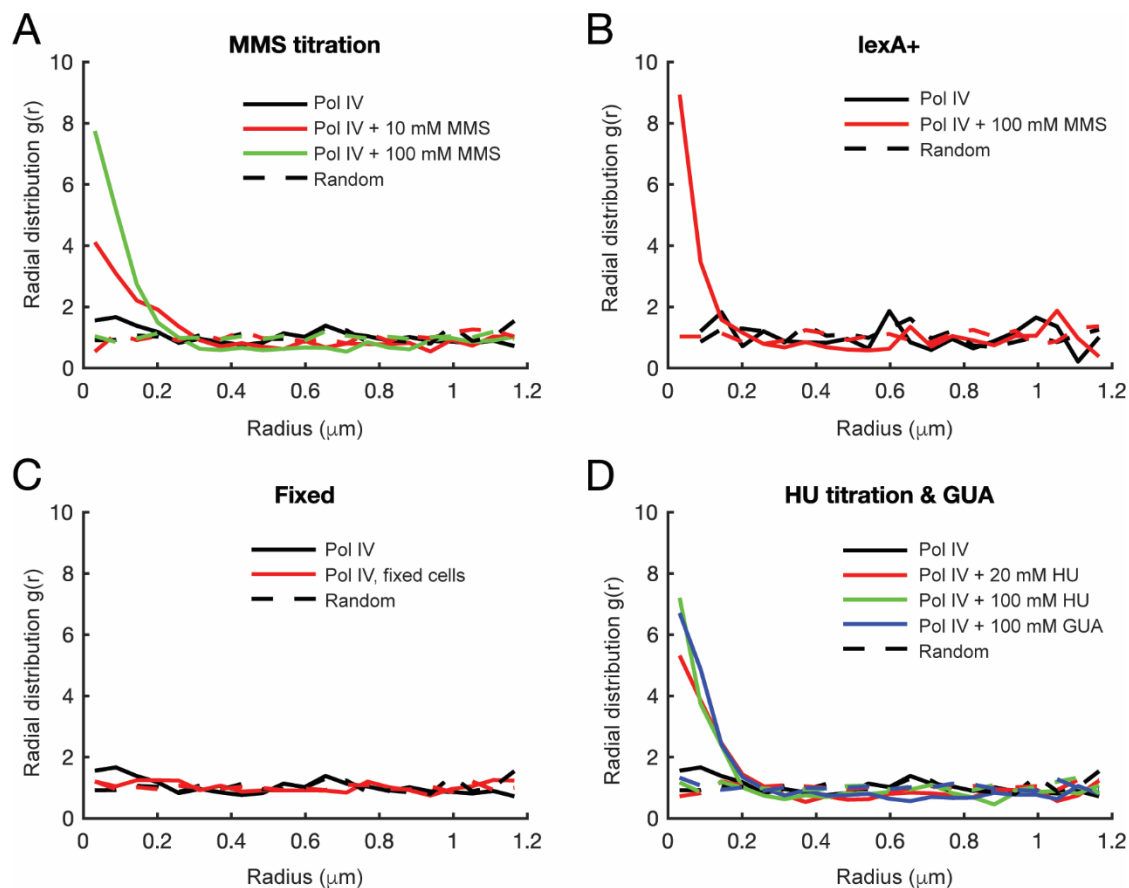

**Fig. S3.** Single-cell colocalization of Pol IV-PAmCherry and SSB-mYPet under different treatment conditions. (A) Radial distribution function  $g(r)$  between each static Pol IV-PAmCherry track and the nearest SSB-mYPet focus for untreated cells (black,  $N = 1,482$ ) and cells treated with 10 mM (red,  $N = 1,273$ ) or 100 mM (green,  $N = 2,754$ ) MMS. (B)  $g(r)$  for untreated cells (black,  $N = 320$ ) and cells treated with 100 mM MMS (red,  $N = 963$ ) in the non-constitutive SOS-induced  $lexA^+$  background. (C)  $g(r)$  for untreated cells (black,  $N = 1,482$ ) and fixed cells (red,  $N = 5,596$ ). (D)  $g(r)$  for untreated cells (black,  $N = 1,482$ ) and cells treated with 100 mM HU (green,  $N = 1,539$ ), 20 mM HU (red,  $N = 2,267$ ), and 100 mM guanazole (blue,  $N = 2,259$ ). The untreated, 100 mM MMS, and 100 mM HU  $g(r)$  curves are replotted from Fig. 1 to enable comparison.

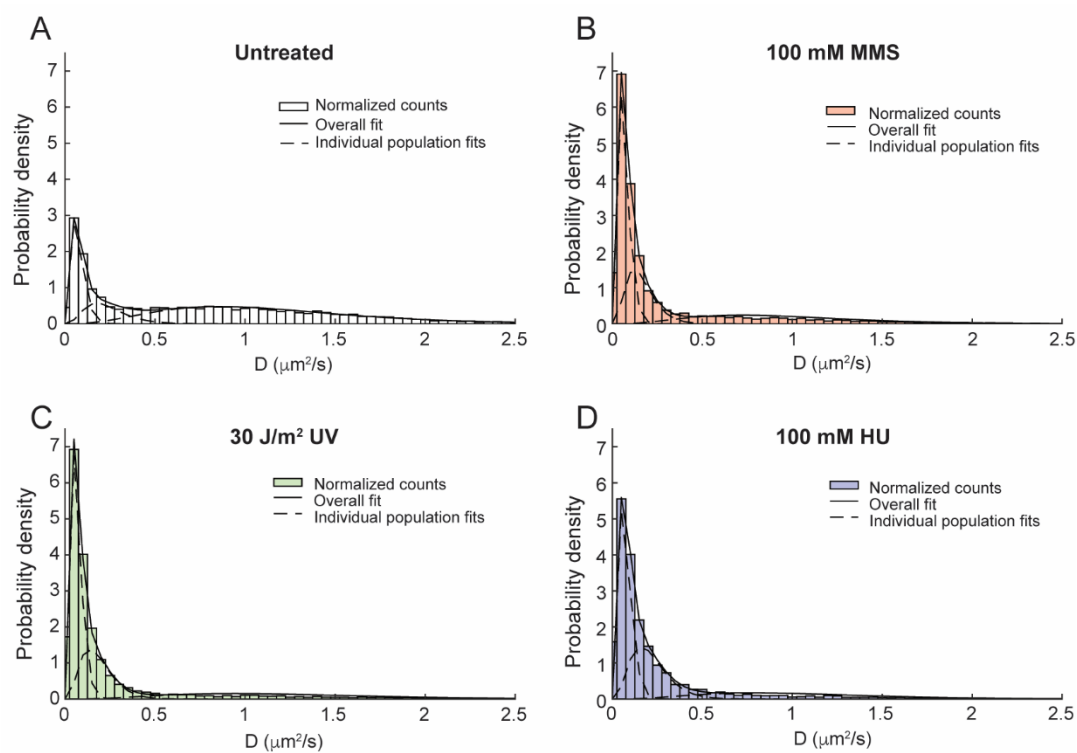

**Fig. S4.** Population fits to the distributions of the apparent diffusion coefficient ( $D^*$ ) for SSB-PAmCherry in (A) untreated cells ( $N = 9,251$ ) and cells treated with (B) 100 mM MMS (red,  $N = 11,797$ ), (C) 30 J/m<sup>2</sup> UV light (green,  $N = 16,542$ ), and (D) 100 mM HU (blue,  $N = 5,690$ ). See Methods and Table S6 for fit equations and parameters.

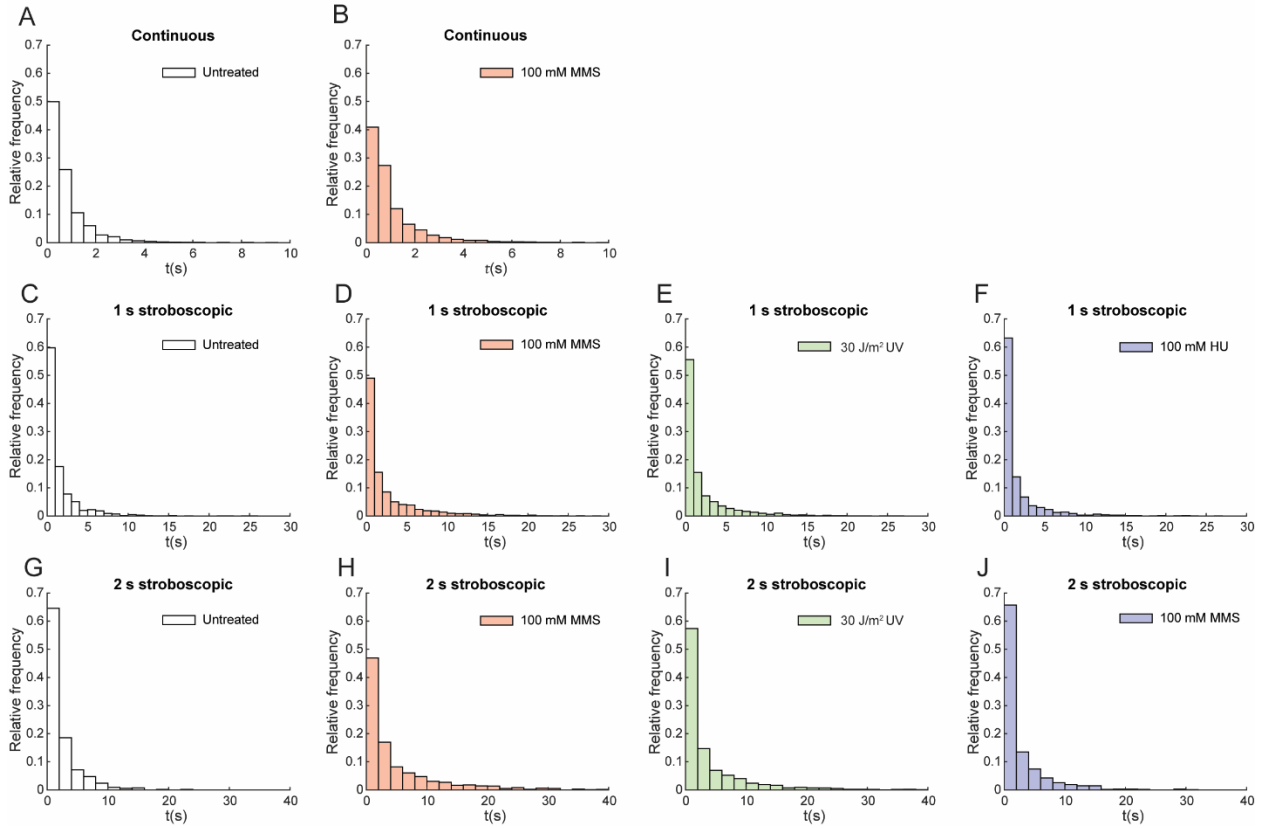

**Fig. S5.** Lifetime distributions of static SSB-PAmCherry tracks. Continuous imaging in (A) untreated cells (white,  $N = 2,965$ ) and (B) cells treated with 100 mM MMS (red,  $N = 6,924$ ). Stroboscopic imaging with a 1-s interval in (C) untreated cells (white,  $N = 1,403$ ) and cells treated with (D) 100 mM MMS (red,  $N = 3,837$ ), (E) 30 J/m<sup>2</sup> UV light (green,  $N = 2,922$ ), and (F) 100 mM HU (blue,  $N = 1,659$ ). Stroboscopic imaging with a 2-s interval in (G) untreated cells (white,  $N = 545$ ) and cells treated with (H) 100 mM MMS (red,  $N = 1,171$ ), (I) 30 J/m<sup>2</sup> UV light (green,  $N = 1,755$ ), and (J) 100 mM HU (blue,  $N = 956$ ).

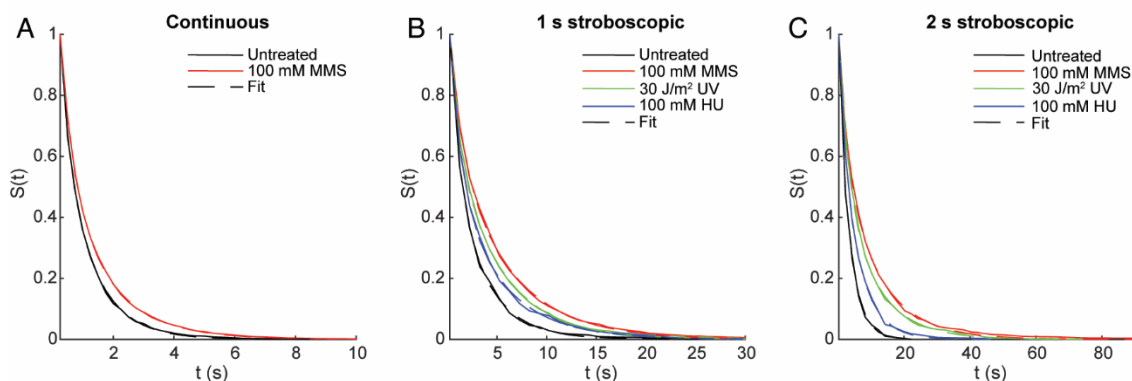

**Fig. S6.** Survival curves of static SSB-PamCherry tracks fit to double-exponential decay functions. (A) Continuous imaging in untreated cells (white,  $N = 2,965$ ) and cells treated with 100 mM MMS for 20 min (red,  $N = 6,924$ ). (B) Stroboscopic imaging with a 1-s interval in untreated (white,  $N = 1,403$ ) cells and cells treated with 100 mM MMS (red,  $N = 3,837$ ), 30 J/m<sup>2</sup> UV light (green,  $N = 2,922$ ), and 100 mM HU (blue,  $N = 1,659$ ). (C) Stroboscopic imaging with a 2-s interval in untreated cells (white,  $N = 545$ ) and cells treated with 100 mM MMS (red,  $N = 1,171$ ), 30 J/m<sup>2</sup> UV light (green,  $N = 1,755$ ), and 100 mM HU (blue,  $N = 956$ ).

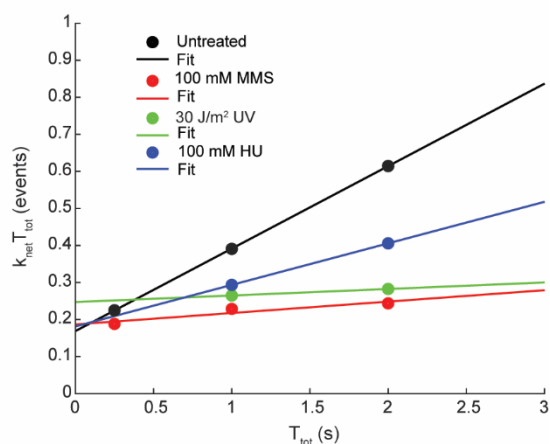

**Fig. S7.** Photobleaching correction to estimated SSB-PamCherry binding lifetimes. Measured apparent dissociation rate constants  $k_{\text{net}}$  from exponential fits to survival curves (see Figure S6) multiplied by the stroboscopic interval  $T_{\text{tot}}$  plotted against  $T_{\text{tot}}$  for untreated cells (black circles) and cells treated with 100 mM MMS (red circles), 30 J/m<sup>2</sup> UV light (green circles), and 100 mM HU (blue circles). Linear fits (solid lines) for each condition give the photobleaching-corrected SSB-PamCherry off rate as the slope and the PamCherry photobleaching rate as the intercept (see Methods).

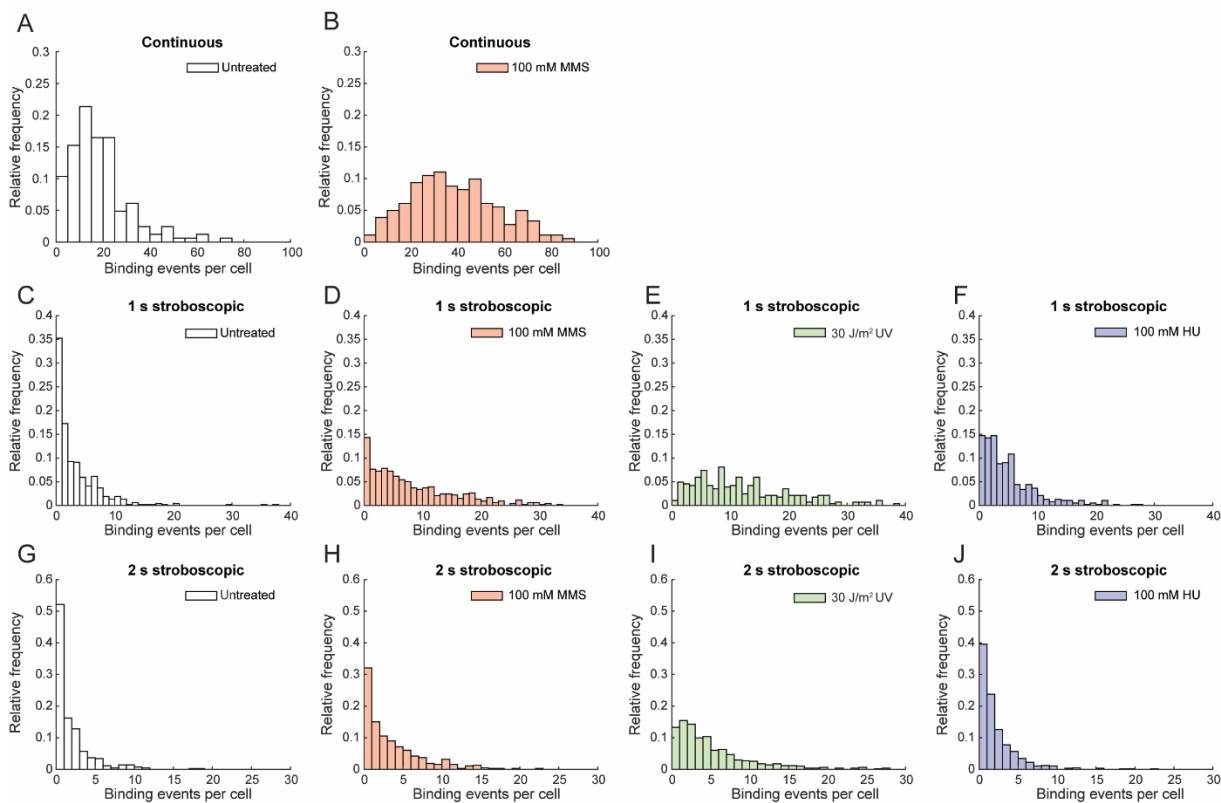

**Fig. S8.** Binding number distributions of static SSB-PAMCherry molecules for continuous imaging in (A) untreated cells (white,  $N = 164$ ) and (B) cells treated with 100 mM MMS (red,  $N = 181$ ). Stroboscopic imaging with a 1-s interval in (C) untreated cells (white,  $N = 539$ ) and cells treated with (D) 100 mM MMS (red,  $N = 538$ ), (E) 30 J/m<sup>2</sup> UV light (green,  $N = 285$ ), and (F) 100 mM HU (blue,  $N = 387$ ). Stroboscopic imaging with a 2-s interval in (G) untreated cells (white,  $N = 437$ ) and cells treated with (H) 100 mM MMS (red,  $N = 380$ ), (I) 30 J/m<sup>2</sup> UV light (green,  $N = 512$ ), and (J) 100 mM HU (blue,  $N = 581$ ).



## Supplementary Tables

**Table S1: Value of the mean radial distribution function  $g(r)$  for Pol IV, PriA, or RecG colocalization with SSB at the smallest value of  $r$ , and the standard error of the mean (S.E.M.) at that  $r$  value for the 100 calculated  $g(r)$  curves**

| Fig. | Protein                 | Condition              | $g(r) \pm \text{S.E.M.}$ | Fig.                                                                                                    | Protein              | Condition            | $g(r) \pm \text{S.E.M.}$ |
|------|-------------------------|------------------------|--------------------------|---------------------------------------------------------------------------------------------------------|----------------------|----------------------|--------------------------|
| 1A   | Pol IV <sup>WT</sup>    | Untreated              | $1.46 \pm 0.04$          | S3A                                                                                                     | Pol IV <sup>WT</sup> | Untreated            | $1.46 \pm 0.04$          |
|      | Pol IV <sup>R,C</sup>   |                        | $0.68 \pm 0.03$          |                                                                                                         |                      | 10 mM MMS            | $4.1 \pm 0.2$            |
|      | Pol IV <sup>T120P</sup> |                        | $0.73 \pm 0.04$          |                                                                                                         |                      | 100 mM MMS           | $7.8 \pm 0.2$            |
| 1B   | Pol IV <sup>WT</sup>    | 100 mM MMS             | $7.8 \pm 0.2$            | S3B                                                                                                     | Pol IV <sup>WT</sup> | Untreated            | See note                 |
|      | Pol IV <sup>R,C</sup>   |                        | $5.4 \pm 0.1$            |                                                                                                         |                      | 100 mM MMS           | $8.9 \pm 0.3$            |
|      | Pol IV <sup>T120P</sup> |                        | $3.04 \pm 0.07$          |                                                                                                         | S3C                  | Pol IV <sup>WT</sup> | Untreated                |
| 1C   | Pol IV <sup>WT</sup>    | 30 J/m <sup>2</sup> UV | $5.1 \pm 0.1$            | S4C                                                                                                     | Pol IV <sup>WT</sup> | Untreated            | $1.46 \pm 0.04$          |
|      | Pol IV <sup>R,C</sup>   |                        | $2.79 \pm 0.05$          |                                                                                                         |                      | 100 mM HU            | $7.7 \pm 0.2$            |
|      | Pol IV <sup>T120P</sup> |                        | $1.7 \pm 0.1$            |                                                                                                         |                      | 20 mM HU             | $5.2 \pm 0.1$            |
| 1D   | Pol IV <sup>WT</sup>    | 100 mM HU              | $7.7 \pm 0.2$            |                                                                                                         |                      | 100 mM GUA           | $6.3 \pm 0.1$            |
|      | Pol IV <sup>R,C</sup>   |                        | $4.4 \pm 0.1$            | Note: The first $g(r)$ bin is not populated for this dataset due to the smaller number of trajectories. |                      |                      |                          |
|      | Pol IV <sup>T120P</sup> |                        | $1.02 \pm 0.08$          |                                                                                                         |                      |                      |                          |
| 4A   | PriA                    | Untreated              | $1.4 \pm 0.1$            |                                                                                                         |                      |                      |                          |
|      |                         | 100 mM MMS             | $3.24 \pm 0.08$          |                                                                                                         |                      |                      |                          |
| 4B   | RecG                    | Untreated              | $1.60 \pm 0.06$          |                                                                                                         |                      |                      |                          |
|      |                         | 100 mM MMS             | $10.1 \pm 0.3$           |                                                                                                         |                      |                      |                          |

**Table S2: Estimated SSB-PAmCherry diffusion coefficients ( $\pm$  S.E.M.)**

| Treatment condition    | Mean $\pm$ S.E.M. ( $\mu\text{m}^2/\text{s}$ ) | Median ( $\mu\text{m}^2/\text{s}$ ) | $N$ (events) | $N$ per cell | Wilcoxon rank-sum $P$ -value relative to untreated |
|------------------------|------------------------------------------------|-------------------------------------|--------------|--------------|----------------------------------------------------|
| Untreated              | $0.743 \pm 0.007$                              | 0.638                               | 9,251        | 5.1          | -                                                  |
| 100 mM MMS             | $0.266 \pm 0.004$                              | 0.095                               | 11,797       | 12.9         | 0.00000                                            |
| 30 J/m <sup>2</sup> UV | $0.245 \pm 0.003$                              | 0.094                               | 16,542       | 23.2         | 0.00000                                            |
| 100 mM HU              | $0.246 \pm 0.005$                              | 0.118                               | 5,690        | 6.8          | 0.00000                                            |

**Table S3: Estimated SSB-PAmCherry diffusion coefficients sorted by distance from the replisome**

| Treatment condition                         | $N(D^* < 0.25 \mu\text{m}^2/\text{s}, \text{static})$ | $N(D^* > 0.25 \mu\text{m}^2/\text{s}, \text{mobile})$ |
|---------------------------------------------|-------------------------------------------------------|-------------------------------------------------------|
| Untreated (all)                             | 2,947                                                 | 5,753                                                 |
| Untreated (< 200 nm replisome)              | 1,014                                                 | 262                                                   |
| Untreated (> 200 nm replisome)              | 1,933                                                 | 5,491                                                 |
| 100 mM MMS (all)                            | 8,763                                                 | 2,681                                                 |
| 100 mM MMS (< 200 nm replisome)             | 4,405                                                 | 371                                                   |
| 100 mM MMS (> 200 nm replisome)             | 4,358                                                 | 2,310                                                 |
| 30 J/m <sup>2</sup> UV (all)                | 12,268                                                | 3,077                                                 |
| 30 J/m <sup>2</sup> UV (< 200 nm replisome) | 2,771                                                 | 232                                                   |
| 30 J/m <sup>2</sup> UV (> 200 nm replisome) | 9,497                                                 | 2,845                                                 |
| 100 mM HU (all)                             | 3,854                                                 | 1,201                                                 |
| 100 mM HU (< 200 nm replisome)              | 511                                                   | 84                                                    |
| 100 mM HU (> 200 nm replisome)              | 3,343                                                 | 1,117                                                 |

**Table S4: SSB-PAmCherry diffusion coefficient distribution fit parameters ( $\pm$  uncertainties from 95% fit confidence intervals)**

| Treatment condition    | $D_1 (\mu\text{m}^2/\text{s})$ | $A_1$                | $D_2 (\mu\text{m}^2/\text{s})$ | $A_2$                | $D_3 (\mu\text{m}^2/\text{s})$ | $A_3$                |
|------------------------|--------------------------------|----------------------|--------------------------------|----------------------|--------------------------------|----------------------|
| Untreated              | 0.0752 $\pm$<br>0.004          | 0.242 $\pm$<br>0.021 | 0.236 $\pm$<br>0.038           | 0.149 $\pm$<br>0.023 | 1.150 $\pm$<br>0.06            | 0.609 $\pm$<br>0.044 |
| 100 mM MMS             | 0.0664 $\pm$<br>0.0094         | 0.470 $\pm$<br>0.116 | 0.163 $\pm$<br>0.051           | 0.274 $\pm$<br>0.11  | 0.972 $\pm$<br>0.308           | 0.256 $\pm$<br>0.226 |
| 30 J/m <sup>2</sup> UV | 0.0689 $\pm$<br>0.0086         | 0.501 $\pm$<br>0.113 | 0.184 $\pm$<br>0.056           | 0.287 $\pm$<br>0.101 | 1.256 $\pm$<br>0.644           | 0.212 $\pm$<br>0.214 |
| 100 mM HU              | 0.0756 $\pm$<br>0.008          | 0.452 $\pm$<br>0.083 | 0.213 $\pm$<br>0.051           | 0.346 $\pm$<br>0.082 | 1.069 $\pm$<br>0.52            | 0.202 $\pm$<br>0.165 |

**Table S5: Integrated SSB-mYPet focus intensity ( $\pm$  S.E.M.)**

| Treatment condition    | Mean $\pm$ S.E.M.<br>(AUe-5) | Median (AUe-5) | $N$ (foci) | Wilcoxon rank-sum<br>$P$ -value relative to<br>untreated |
|------------------------|------------------------------|----------------|------------|----------------------------------------------------------|
| Untreated              | 2.40 $\pm$ 0.05              | 1.61           | 2,138      | -                                                        |
| 100 mM MMS             | 3.16 $\pm$ 0.07              | 2.53           | 1,309      | 0.00000                                                  |
| 30 J/m <sup>2</sup> UV | 6.6 $\pm$ 0.2                | 3.57           | 2,015      | 0.00000                                                  |
| 100 mM HU              | 2.87 $\pm$ 0.08              | 2.04           | 1,207      | 0.00000                                                  |

**Table S6: Number of SSB-mYPet foci per cell ( $\pm$  S.E.M.)**

| <b>Treatment condition</b> | <b>Mean <math>\pm</math> S.E.M.</b> | <b>Median</b> | <b>N (cells)</b> | <b>Wilcoxon rank-sum P-value relative to untreated</b> |
|----------------------------|-------------------------------------|---------------|------------------|--------------------------------------------------------|
| Untreated                  | 1.06 $\pm$ 0.02                     | 1             | 2,021            | -                                                      |
| 100 mM MMS                 | 1.11 $\pm$ 0.02                     | 1             | 1,182            | 0.00311                                                |
| 30 J/m <sup>2</sup> UV     | 1.22 $\pm$ 0.02                     | 1             | 1,646            | 0.00000                                                |
| 100 mM HU                  | 1.29 $\pm$ 0.03                     | 1             | 938              | 0.00000                                                |

**Table S7: SSB-PAmCherry binding lifetimes ( $\pm$  S.E.M.)**

| <b>Treatment condition (Stroboscopic interval)</b> | <b>Mean <math>\pm</math> S.E.M. (s)</b> | <b>N (events)</b> | <b>N (cells)</b> | <b>Wilcoxon rank-sum P-value relative to untreated</b> |
|----------------------------------------------------|-----------------------------------------|-------------------|------------------|--------------------------------------------------------|
| Untreated (2 s)                                    | 1.7 $\pm$ 0.1                           | 545               | 437              | -                                                      |
| 100 mM MMS (2 s)                                   | 5.2 $\pm$ 0.3                           | 1,171             | 380              | 0.00000                                                |
| 30 J/m <sup>2</sup> UV (2 s)                       | 3.6 $\pm$ 0.2                           | 1,755             | 512              | 0.00001                                                |
| 100 mM HU (2 s)                                    | 2.3 $\pm$ 0.1                           | 956               | 581              | 0.69151                                                |
| Untreated (1 s)                                    | 1.41 $\pm$ 0.06                         | 1,403             | 539              | -                                                      |
| 100 mM MMS (1 s)                                   | 2.66 $\pm$ 0.07                         | 3,837             | 538              | 0.00000                                                |
| 30 J/m <sup>2</sup> UV (1 s)                       | 2.08 $\pm$ 0.07                         | 2,922             | 285              | 0.00003                                                |
| 100 mM HU (1 s)                                    | 1.62 $\pm$ 0.08                         | 1,659             | 387              | 0.29163                                                |
| Untreated (continuous)                             | 0.72 $\pm$ 0.02                         | 2,965             | 164              | -                                                      |
| 100 mM MMS (continuous)                            | 0.94 $\pm$ 0.01                         | 6,924             | 181              | 0.00000                                                |

**Table S8: SSB-PAmCherry survival fit parameters ( $\pm$  uncertainties from 95% fit confidence intervals)**

| Treatment condition    | 2 s interval  |                           |               |                           | 1 s interval  |                           |               |                           | Continuous    |                           |               |                           |
|------------------------|---------------|---------------------------|---------------|---------------------------|---------------|---------------------------|---------------|---------------------------|---------------|---------------------------|---------------|---------------------------|
|                        | <i>A</i>      | <i>T</i> <sub>1</sub> (s) | <i>B</i>      | <i>T</i> <sub>2</sub> (s) | <i>A</i>      | <i>T</i> <sub>1</sub> (s) | <i>B</i>      | <i>T</i> <sub>2</sub> (s) | <i>A</i>      | <i>T</i> <sub>1</sub> (s) | <i>B</i>      | <i>T</i> <sub>2</sub> (s) |
| Untreated              | 0.1±<br>0.6   | 0±4                       | 0.9±<br>0.2   | 3.4±<br>0.4               | 0.40±<br>0.07 | 0.9±<br>0.2               | 0.60±<br>0.09 | 3.3±<br>0.3               | 0.30±<br>0.02 | 0.27±<br>0.05             | 0.70±<br>0.07 | 1.01±<br>0.05             |
| 100 mM MMS             | 0.38±<br>0.06 | 2.7±<br>0.5               | 0.61±<br>0.07 | 11.3±<br>0.8              | 0.31±<br>0.03 | 1.1±<br>0.2               | 0.68±<br>0.03 | 5.5±<br>0.2               | 0.44±<br>0.02 | 0.44±<br>0.03             | 0.56±<br>0.03 | 1.49±<br>0.04             |
| 30 J/m <sup>2</sup> UV | 0.47±<br>0.08 | 3.0±<br>0.5               | 0.52±<br>0.09 | 10±<br>1                  | 0.32±<br>0.02 | 0.9±<br>0.1               | 0.68±<br>0.03 | 4.7±<br>0.2               | -             | -                         | -             | -                         |
| 100 mM HU              | 0.3±<br>0.1   | 1.7±<br>0.8               | 0.7±<br>0.1   | 5.7±<br>0.5               | 0.45±<br>0.05 | 1.1±<br>0.2               | 0.55±<br>0.06 | 4.8±<br>0.4               | -             | -                         | -             | -                         |

**Table S9: Photobleaching-corrected SSB-PAmCherry survival times ( $\pm$  uncertainties from 95% fit confidence intervals)**

| Treatment condition                   | <i>k</i> <sub>off</sub> (s <sup>-1</sup> ) | <i>T</i> <sub>off</sub> (s) | <i>k</i> <sub>bleach</sub> (s <sup>-1</sup> ) |
|---------------------------------------|--------------------------------------------|-----------------------------|-----------------------------------------------|
| Untreated                             | 0.22±0.07                                  | 4±1                         | 0.7±0.2                                       |
| 100 mM MMS                            | 0.031±0.009                                | 32±9                        | 0.7±0.2                                       |
| 30 J/m <sup>2</sup> UV                | 0.018±0.04                                 | 60±10                       | 1.0±0.2                                       |
| 100 mM HU                             | 0.11±0.06                                  | 9±5                         | 0.7±0.4                                       |
| <b>Mean <i>k</i><sub>bleach</sub></b> |                                            |                             | 0.8±0.6                                       |

**Table S10: Number of SSB-PAmCherry binding events ( $\pm$  S.E.M.)**

| <b>Treatment condition<br/>(Stroboscopic interval)</b> | <b>Mean <math>\pm</math> S.E.M.<br/>(events)</b> | <b>Median (events)</b> | <b>N (cells)</b> | <b>Wilcoxon rank-sum P-<br/>value relative to untreated</b> |
|--------------------------------------------------------|--------------------------------------------------|------------------------|------------------|-------------------------------------------------------------|
| Untreated (2 s)                                        | 1.4 $\pm$ 0.1                                    | 0                      | 437              | -                                                           |
| 100 mM MMS (2 s)                                       | 3.1 $\pm$ 0.2                                    | 2                      | 380              | 0.00000                                                     |
| 30 J/m <sup>2</sup> UV (2 s)                           | 4.7 $\pm$ 0.2                                    | 3                      | 512              | 0.00000                                                     |
| 100 mM HU (2 s)                                        | 1.8 $\pm$ 0.1                                    | 1                      | 581              | 0.00086                                                     |
| Untreated (1 s)                                        | 3.0 $\pm$ 0.2                                    | 1                      | 539              | -                                                           |
| 100 mM MMS (1 s)                                       | 7.6 $\pm$ 0.3                                    | 5                      | 538              | 0.00000                                                     |
| 30 J/m <sup>2</sup> UV (1 s)                           | 11.8 $\pm$ 0.5                                   | 10                     | 285              | 0.00000                                                     |
| 100 mM HU (1 s)                                        | 4.6 $\pm$ 0.2                                    | 3                      | 387              | 0.00000                                                     |
| Untreated<br>(continuous)                              | 18 $\pm$ 1                                       | 15                     | 164              | -                                                           |
| 100 mM MMS<br>(continuous)                             | 38 $\pm$ 1                                       | 37                     | 181              | 0.00000                                                     |

**Table S11: Oligonucleotides and Gene Blocks used in this study**

| Number | Designation                          | Sequence (5'-3')                                                                                                                                                                                                                                                                                                                                                                                                                                                                                                                                                                                                                                                                                                                                                                                                                                                                                                                                                                                                                                                                                                                                                                                                                                                                                                                                                    |
|--------|--------------------------------------|---------------------------------------------------------------------------------------------------------------------------------------------------------------------------------------------------------------------------------------------------------------------------------------------------------------------------------------------------------------------------------------------------------------------------------------------------------------------------------------------------------------------------------------------------------------------------------------------------------------------------------------------------------------------------------------------------------------------------------------------------------------------------------------------------------------------------------------------------------------------------------------------------------------------------------------------------------------------------------------------------------------------------------------------------------------------------------------------------------------------------------------------------------------------------------------------------------------------------------------------------------------------------------------------------------------------------------------------------------------------|
| oET110 | recG-G4S-PAmC-KI-for                 | CTGATAGAACGCTGGATGCCGGAGACGGAACGTTACTCGAATG<br>CGGGTGGTGGTGGTTCTGGTGG                                                                                                                                                                                                                                                                                                                                                                                                                                                                                                                                                                                                                                                                                                                                                                                                                                                                                                                                                                                                                                                                                                                                                                                                                                                                                               |
| oET111 | recG-PAmC-KI-rev                     | GGAAGGTAGGGTAACCTGAAATGGCGGTCTTCTCACTGCCGCC<br>TTTCTTATGAATATCCTCCTTAGTTCC                                                                                                                                                                                                                                                                                                                                                                                                                                                                                                                                                                                                                                                                                                                                                                                                                                                                                                                                                                                                                                                                                                                                                                                                                                                                                          |
| oET114 | priA-G4S-PAmC-KI-for                 | TCCCCGTAAGGTGAAATGGGTGCTGGATGTTGATCCGATTGAGG<br>GTGGTGGTGGTGGTTCTGGTGG                                                                                                                                                                                                                                                                                                                                                                                                                                                                                                                                                                                                                                                                                                                                                                                                                                                                                                                                                                                                                                                                                                                                                                                                                                                                                              |
| oET115 | priA-PAmC-KI-rev                     | GTGATGAATATTGAATTTTTTCGATCCGCCTCGCATCGTGAGCG<br>GTTCTTATGAATATCCTCCTTAGTTCC                                                                                                                                                                                                                                                                                                                                                                                                                                                                                                                                                                                                                                                                                                                                                                                                                                                                                                                                                                                                                                                                                                                                                                                                                                                                                         |
| oJK022 | Lambda red P1                        | GTGTAGGCTGGAGCTGCTTC                                                                                                                                                                                                                                                                                                                                                                                                                                                                                                                                                                                                                                                                                                                                                                                                                                                                                                                                                                                                                                                                                                                                                                                                                                                                                                                                                |
| oJK197 | lacZ-SSB-mYpet-KI_for                | TGTGGAATTGTGAGCGGATAACAATTTACACAGGAAACAGCT<br>ATGGCCAGCAGAGGCGTAAA                                                                                                                                                                                                                                                                                                                                                                                                                                                                                                                                                                                                                                                                                                                                                                                                                                                                                                                                                                                                                                                                                                                                                                                                                                                                                                  |
| oJK198 | lacZ-SSB-mYpet-KI_rev                | TCATCATATTTAATCAGCGACTGATCCACCCAGTCCCAGACGA<br>AGATGAATATCCTCCTTAGTTCCCTA                                                                                                                                                                                                                                                                                                                                                                                                                                                                                                                                                                                                                                                                                                                                                                                                                                                                                                                                                                                                                                                                                                                                                                                                                                                                                           |
| oJK277 | rc_pKD4_9_30                         | AATCGCTCAAGACGTGTAATGC                                                                                                                                                                                                                                                                                                                                                                                                                                                                                                                                                                                                                                                                                                                                                                                                                                                                                                                                                                                                                                                                                                                                                                                                                                                                                                                                              |
| SO572  | pKD3/4-recG-KO-for                   | ACTGGTGGGCTACTATGCAGGCTGCAGGGTAAGTGCCATGGTG<br>TAGGCTGGAGCTGCTT                                                                                                                                                                                                                                                                                                                                                                                                                                                                                                                                                                                                                                                                                                                                                                                                                                                                                                                                                                                                                                                                                                                                                                                                                                                                                                     |
| SO573  | pKD3/4-recG-KO-rev                   | GTCTTCTCACTGCCGCCTTTTACGCATTCGAGTAACGTTCTAT<br>GAATATCCTCCTTAGT                                                                                                                                                                                                                                                                                                                                                                                                                                                                                                                                                                                                                                                                                                                                                                                                                                                                                                                                                                                                                                                                                                                                                                                                                                                                                                     |
| gbS282 | Gblock-pKD4-ssb-linker-<br>Pamcherry | GCTTGCATGCAGATTGCAGCATTACACGTCTTGAGCGATTATG<br>GCCAGCAGAGGCGTAAACAAGGTTATTCTCGTTGGTAATCTGG<br>GTCAGGACCCGGAAGTACGCTACATGCCAAATGGTGGCGCAGT<br>TGCCAACATTACGCTGGCTACTTCCGAATCCTGGCGTGATAAA<br>GCGACCGGCGAGATGAAAGAACAGACTGAATGGCACCAGCGTTG<br>TGCTGTTCCGGCAAACCTGGCAGAAGTGGCGAGCGAATATCTGCG<br>TAAAGGTTCTCAGGTTTATATCGAAGGTCAGCTGCGTACCCGT<br>AAATGGACCGATCAATCCGGTCAGGATCGCTACACCACAGAAG<br>TCGTGGTGAACGTTGGCGGCACCATGCAGATGCTGGGTGGTTCG<br>TCAGGGTGGTGGCGCTCCGGCAGGTGGCAATATCGGTGGTGGT<br>CAGCCGCAGGGCGGTTGGGGTCAGCCTCAGCAGCCGCAGGGTG<br>GCAATCAGTTCAGCGGCGGCGCAGTCTCGCCCGCAGCAGTC<br>CGTCCGGCAGCGCCGTCTAACGAGCCCGCGATGGACTTTGAT<br>GATGACATTCCGTTTCAGCTCGGCTGGCTCCGCTGCTGGTTCTG<br>GCCAATTCATGGTTAGCAAGGGCGAGGAGGATAACATGGCCAT<br>CATTAAAGGAGTTCATGCGCTTCAAGGTGCACATGGAGGGGTCC<br>GTGAACGGCCACGTGTTTCGAGATCGAGGGCGAGGGCGAGGGCC<br>GCCCCACGAGGGCACCCAGACCGCAAGCTGAAGGTGACCAA<br>GGGTGGCCCCCTGCCCTTACCTGGGACATCCTGTCCCCCTCAA<br>TTCATGTACGGCTCCAATGCCTACGTGAAGCACCCCGCCGACA<br>TCCCCGACTACTTTAAGCTGTCCTTCCCCGAGGGCTTCAAGTG<br>GGAGCGCGTGATGAAATTCGAGGACGGCGGCGTGGTGACCGTG<br>ACCCAGGACTCCTCCCTGCAGGACGGTGAGTTCATCTACAAGG<br>TGAAGCTGCGCGGCACCAACTTCCCCCTCCGACGGCCCCGTAAT<br>GCAGAAGAAGACCATGGGCTGGGAGGCCCTCTCCGAGCGGATG<br>TACCCCGAGGACGGCGCCCTGAAGGGCGAGGTCAAGCCGAGAG<br>TGAAGCTGAAGGACGGCGGCCACTACGACGCTGAGGTCAAGAC<br>CACCTACAAGGCCAAGAAGCCCGTGCAGCTGCCCGGCGCCTAC |

|  |  |                                                                                                                                                                           |
|--|--|---------------------------------------------------------------------------------------------------------------------------------------------------------------------------|
|  |  | AACGTCAACCGCAAGTTGGACATCACCTCACACAACGAGGACT<br>ACACCATCGTGGAACAGTACGAACGTGCCGAGGGCCGCCACTC<br>CACCGGCGGCATGGACGAGCTGTACAAGTAAGTGTAGGCTGGA<br>GCTGCTTCGAAGTTCCTATACTTTCTAG |
|--|--|---------------------------------------------------------------------------------------------------------------------------------------------------------------------------|

**Table S12: Plasmids used in this study**

| Designation               | Containing Strain | Source or Reference |
|---------------------------|-------------------|---------------------|
| pKD3                      | JEK42             | (1)                 |
| pKD4                      | JEK45             | (1)                 |
| pSIM5                     | JEK168            | (2)                 |
| pCP20                     | JEK169            | (3)                 |
| pKD4-G4S-PAmCherry        | JEK573            | (4)                 |
| pKD3-ssb-linker-PAmCherry | SE99              | This study          |
| pSIM6                     | S235              | (2)                 |

**Table S13: *Escherichia coli* bacterial strains used in this study**

| Number | Designation or description                                                   | Relevant genotype                                                                                   | Construction or source strain designation | Reference  |
|--------|------------------------------------------------------------------------------|-----------------------------------------------------------------------------------------------------|-------------------------------------------|------------|
| ET227  | $\Delta lexA$ Pol IV <sup>T120P</sup> -PAmCherry SSB-mYPet                   | RW542 <i>dinB</i> <sup>T120P</sup> -<br><i>PAmCherry-frt-kan-frt</i><br><i>lacZ::ssb-mypet-frt</i>  | Same                                      | (5)        |
| ET240  | $\Delta lexA$ SSB-PAmCherry                                                  | RW542 <i>lacZ::ssb</i> -<br><i>PAmCherry-frt-cat-frt</i>                                            | P1vir: S146 → JEK418                      | This study |
| ET340  | $\Delta lexA$ SSB-PAmCherry                                                  | RW542 <i>lacZ::ssb</i> -<br><i>PAmCherry-frt</i>                                                    | ET240 pCP20 Flp-FRT recombination         | This study |
| ET350  | $\Delta lexA$ SSB-PAmCherry $\epsilon$ -mYPet                                | RW542 <i>lacZ::ssb</i> -<br><i>PAmCherry-frt dnaQ</i> -<br><i>mypet-frt-cat-frt</i>                 | P1vir: JEK466 → ET340                     | This study |
| ET352  | $\Delta lexA \Delta dinB$                                                    | RW542 $\Delta dinB::frt-kan$ -<br><i>frt</i>                                                        | P1vir: JEK337 → JEK418                    | This study |
| JEK5   | <i>E. coli</i> K-12 type strain                                              | MG1655                                                                                              | —                                         | —          |
| JEK168 | <i>E. coli</i> K-12 type strain with Cm <sup>R</sup> recombineering plasmid  | pSIM5 in MG1655                                                                                     | Same                                      | (2, 4)     |
| JEK170 | <i>E. coli</i> K-12 type strain with Amp <sup>R</sup> recombineering plasmid | pKD46 in MG1655                                                                                     | Same                                      | (1, 4)     |
| JEK337 | $\Delta dinB$                                                                | MG1655 $\Delta dinB::frt-kan$ -<br><i>frt</i>                                                       | Same                                      | (4)        |
| JEK418 | $\Delta lexA$                                                                | <i>lexA51(Def) rpsL31 xyl-5</i><br><i>mtl-1 galK2 lacY1 tsx-33</i><br><i>supE44 thi-1 hisG4[Oc]</i> | RW542                                     | (6)        |

|        |                                                                             |                                                                           |                                                   |            |
|--------|-----------------------------------------------------------------------------|---------------------------------------------------------------------------|---------------------------------------------------|------------|
|        |                                                                             | <i>argE3[Oc] araD139 thr-1 Δ[gpt-proA]62 sulA211</i>                      |                                                   |            |
| JEK466 | ε-mYPet                                                                     | CH1358 <i>dnaQ-mypet-frt-cat-frt</i>                                      | Same                                              | (4)        |
| JEK625 | Pol IV-PAmCherry                                                            | MG1655 <i>dinB-PAmCherry-frt-kan-frt</i>                                  | Same                                              | (4)        |
| JEK726 | Pol IV <sup>R,C</sup> -PAmCherry                                            | MG1655 <i>dinB<sup>R,C</sup>-PAmCherry-frt-kan-frt</i>                    | Same                                              | (4)        |
| JEK762 | Δ <i>lexA</i> SSB-mYPet                                                     | RW542 <i>lacZ::ssb-mypet-frt</i>                                          | Same                                              | (4)        |
| JEK766 | Δ <i>lexA</i> Pol IV-PAmCherry SSB-mYPet                                    | RW542 <i>dinB-PAmCherry-frt-kan-frt lacZ::ssb-mypet-frt</i>               | Same                                              | (4)        |
| JEK784 | <i>lexA+</i> Pol IV-PAmCherry SSB-mYPet                                     | RW118 <i>dinB-PAmCherry-frt-kan-frt lacZ::ssb-mypet-frt</i>               | Same                                              | (4)        |
| JEK790 | Δ <i>lexA</i> Pol IV <sup>R,C</sup> -PAmCherry SSB-mYPet                    | RW542 <i>dinB<sup>R,C</sup>-PAmCherry-frt-kan-frt lacZ::ssb-mypet-frt</i> | Same                                              | (4)        |
| S146   | SSB-PAmCherry                                                               | MG1655 <i>lacZ::ssb-PAmCherry-frt-cat-frt</i>                             | λ Red: SSB-PAmCherry-FRT-Cat-FRT → MG1655 pSIM5   | This study |
| S235   | <i>E.coli</i> K-12 type strain with Amp <sup>R</sup> recombineering plasmid | pSIM6 in MG1655                                                           | Transformation: pSIM6 → JEK5                      | (2)        |
| S473   | Δ <i>recG</i>                                                               | MG1655 <i>ΔrecG::frt-kan-frt</i>                                          | λ Red: Δ <i>recG</i> ::FRT-Kan-FRT → MG1655 pSIM5 | This study |
| SCP004 | RecG-PAmCherry                                                              | MG1655 <i>recG-PAmCherry-frt-kan-frt</i>                                  | λ Red: RecG-PAmCherry-FRT-Kan-FRT → MG1655 pSIM5  | This study |
| SCP007 | PriA-PAmCherry                                                              | MG1655 <i>priA-PAmCherry-frt-kan-frt</i>                                  | λ Red: PriA-PAmCherry-FRT-Kan-FRT → MG1655 pSIM5  | This study |
| SCP008 | Δ <i>lexA</i> PriA-PAmCherry SSB-mYPet                                      | RW542 <i>priA-PAmCherry-frt-kan-frt lacZ::ssb-mypet-frt</i>               | P1vir: SCP007 → JEK762                            | This study |
| SCP012 | Δ <i>lexA</i> RecG-PAmCherry SSB-mYPet                                      | RW542 <i>recG-PAmCherry-frt-kan-frt lacZ::ssb-mypet-frt</i>               | P1vir: SCP004 → JEK762                            | This study |



**Table S14: Imaging dataset size**

| Dataset                                                                   | Fig.                      | Number of Days | Number of Replicates | Number of Cells | Number of Tracks or Foci |
|---------------------------------------------------------------------------|---------------------------|----------------|----------------------|-----------------|--------------------------|
| Pol IV <sup>WT</sup> untreated $g(r)$                                     | 1A, S3A, S3C – D          | 2              | 2                    | 343             | 1,482                    |
| Pol IV <sup>R,C</sup> untreated $g(r)$                                    | 1A                        | 3              | 4                    | 539             | 1,090                    |
| Pol IV <sup>T120P</sup> untreated $g(r)$                                  |                           | 2              | 2                    | 269             | 878                      |
| Pol IV <sup>WT</sup> 100 mM MMS $g(r)$                                    | 1B, S3A                   | 2              | 2                    | 360             | 2,754                    |
| Pol IV <sup>R,C</sup> 100 mM MMS $g(r)$                                   | 1B                        | 4              | 5                    | 562             | 2,894                    |
| Pol IV <sup>T120P</sup> 100 mM MMS $g(r)$                                 |                           | 3              | 3                    | 690             | 2,331                    |
| Pol IV <sup>WT</sup> 30 J/m <sup>2</sup> UV $g(r)$                        | 1C                        | 2              | 3                    | 630             | 2,681                    |
| Pol IV <sup>R,C</sup> 30 J/m <sup>2</sup> UV $g(r)$                       |                           | 4              | 4                    | 899             | 3,261                    |
| Pol IV <sup>T120P</sup> 30 J/m <sup>2</sup> UV $g(r)$                     |                           | 2              | 3                    | 581             | 1,142                    |
| Pol IV <sup>WT</sup> 100 mM HU $g(r)$                                     | 1D, S3D                   | 2              | 3                    | 439             | 1,539                    |
| Pol IV <sup>R,C</sup> 100 mM HU $g(r)$                                    | 1D                        | 2              | 4                    | 630             | 1,479                    |
| Pol IV <sup>T120P</sup> 100 mM HU $g(r)$                                  |                           | 2              | 4                    | 866             | 1,207                    |
| SSB untreated $D^*$ (only cells with an $\epsilon$ -mYPet focus)          | 2A – C                    | 3              | 3                    | 631             | 8,772                    |
| SSB untreated $D^*$                                                       | 2C – F, S4A               | 3              | 3                    | 631             | 9,251                    |
| SSB 100 mM MMS $D^*$                                                      | 2D, S4B                   | 3              | 3                    | 705             | 11,797                   |
| SSB 30 J/m <sup>2</sup> UV $D^*$                                          | 2E, S4C                   | 3              | 3                    | 581             | 16,542                   |
| SSB 100 mM HU $D^*$                                                       | 2F, S4D                   | 3              | 4                    | 653             | 5,690                    |
| SSB untreated focus intensity                                             | 3A – C                    | 6              | 6                    | 2021            | 2,138                    |
| SSB 100 mM MMS focus intensity                                            | 3A                        | 3              | 3                    | 1182            | 1,309                    |
| SSB 30 J/m <sup>2</sup> UV focus intensity                                | 3B                        | 2              | 3                    | 1646            | 2,015                    |
| SSB 100 mM HU focus intensity                                             | 3C                        | 2              | 3                    | 938             | 1,207                    |
| SSB untreated survival and binding events (2-s stroboscopic)              | 3D – F, S4G, S6C, S7, S8G | 4              | 4                    | 437             | 545                      |
| SSB 100 mM MMS survival and binding events (2-s stroboscopic)             | 3D, S4H, S6C, S7, S8H     | 3              | 3                    | 380             | 1,171                    |
| SSB 30 J/m <sup>2</sup> UV survival and binding events (2-s stroboscopic) | 3E, S4I, S6C, S7, S8I     | 2              | 3                    | 512             | 1,755                    |
| SSB 100 mM HU survival and binding events (2-s stroboscopic)              | 3F, S4J, S6C, S7, S8J     | 5              | 5                    | 581             | 956                      |
| PriA untreated $g(r)$                                                     | 4A                        | 2              | 3                    | 755             | 781                      |
| PriA 100 mM MMS $g(r)$                                                    |                           | 3              | 3                    | 1105            | 2,412                    |
| RecG untreated $g(r)$                                                     | 4B                        | 2              | 3                    | 577             | 1,189                    |
| RecG 100 mM MMS $g(r)$                                                    |                           | 2              | 3                    | 492             | 1,694                    |
| Pol IV <sup>WT</sup> 10 mM MMS $g(r)$                                     | S3A                       | 1              | 2                    | 402             | 1,273                    |
| Pol IV <sup>WT</sup> $lexA^+$ untreated $g(r)$                            | S3B                       | 4              | 6                    | 536             | 320                      |
| Pol IV <sup>WT</sup> $lexA^+$ 100 mM MMS $g(r)$                           |                           | 4              | 6                    | 647             | 963                      |
| Pol IV <sup>WT</sup> untreated fixed $g(r)$                               | S3C                       | 4              | 6                    | 168             | 5,596                    |
| Pol IV <sup>WT</sup> 20 mM HU $g(r)$                                      | S3D                       | 2              | 3                    | 587             | 2,267                    |
| Pol IV <sup>WT</sup> 100 mM GUA $g(r)$                                    |                           | 3              | 4                    | 800             | 2,259                    |
| SSB untreated survival and binding events (continuous)                    | S5A, S6A, S7, S8A         | 1              | 1                    | 164             | 2,965                    |
| SSB 100 mM MMS survival and binding events (continuous)                   | S5B, S6A, S7, S8B         | 1              | 1                    | 181             | 6,924                    |
| SSB untreated survival and binding events (1-s stroboscopic)              | S5C, S6B, S7, S8C         | 4              | 4                    | 539             | 1,403                    |

|                                                                           |                   |   |   |     |       |
|---------------------------------------------------------------------------|-------------------|---|---|-----|-------|
| SSB 100 mM MMS survival and binding events (1-s stroboscopic)             | S5D, S6B, S7, S8D | 5 | 5 | 538 | 3,837 |
| SSB 30 J/m <sup>2</sup> UV survival and binding events (1-s stroboscopic) | S5E, S6B, S7, S8E | 2 | 3 | 285 | 2,922 |
| SSB 100 mM HU survival and binding events (1-s stroboscopic)              | S5F, S6B, S7, S8F | 5 | 5 | 387 | 1,659 |

## **Supplementary Methods**

### *Overview of strain construction strategy:*

Bacterial strains containing fluorescent protein fusions were constructed using Lambda Red recombineering(1) and P1*vir* transduction as previously described.(4) In brief, the *E. coli* K-12 type strain, MG1655, was transformed with the temperature-sensitive recombineering plasmids pSIM5 (chloramphenicol) or pSIM6 (ampicillin).(2) Recombineering fragments bearing approximately 50 bp length homology arms were generated by PCR amplification (Q5 polymerase, New England Biolabs) of pKD3- or pKD4-based plasmids and transformed into MG1655 pSIM5 or pSIM6 by electroporation. Recombinants were selected on LB agar plates containing the appropriate antibiotic (chloramphenicol for pKD3, kanamycin for pKD4) and the recombineering plasmids were cured by growth at 37 °C. The modified alleles were then moved into the appropriate strain background for imaging using P1*vir* transduction. When required for further strain construction steps, FRT-flanked antibiotic cassettes were removed using Flp-FRT recombination with the temperature-sensitive plasmid pCP20, leaving a scar of approximately 80 bp containing a single FRT site.(3) Fusions were validated at each step by PCR amplification of genomic DNA and Sanger DNA sequencing. All oligonucleotides, plasmids, and bacterial strains used in this study are listed in Tables S11 – S13 and construction details for individual strains are given below.

The photoactivatable fluorescent protein PAmCherry1(7) was used to make Pol IV, SSB, PriA, and RecG fusions for PALM imaging, and the monomeric YFP variant mYPet(8) was used to make SSB and  $\epsilon$  replisome marker fusions. All fusions contained a linker between the C-terminus of the protein and the N-terminus of the fluorescent protein: (GGGS)<sub>4</sub> for PamCherry fusions to Pol IV, PriA, and RecG; SSAGSAAGSGEF for the mYPet and PAmCherry fusions to SSB; and SAGSAAGSGEF for the mYPet fusion to  $\epsilon$ .

### *Detailed strain construction information:*

**ET240/ET340:**  $\Delta$ *lexA* SSB-PAmCherry. P1*vir* transduction was used to transfer the *ssb-PAmCherry* allele from strain S146 to strain JEK418. Plasmid pCP20 was then transformed into strain ET240 and Flp-FRT recombination was used to remove the Cm cassette, giving strain ET340.

**ET350:**  $\Delta$ *lexA* SSB-PAmCherry  $\epsilon$ -mYPet. P1*vir* transduction was used to transfer the *dnaQ-mYPet* allele from strain JEK466 to strain ET340.

**ET352:**  $\Delta$ *lexA*  $\Delta$ *dinB*. P1*vir* transduction was used to transfer the  $\Delta$ *dinB::frrt-kan-frrt* allele from strain JEK337 to strain JEK418.

**S146:** MG1655 SSB-PAmCherry. In this construct, nucleotides nt1-1697 of *lacZ* were replaced with *ssb-PAmCherry-frt-cat-frt*. A backbone fragment of the plasmid pKD3 was amplified using the oligonucleotides Lambda red P1 and rc\_pKD4\_9\_30 and combined with a Gene Block containing the SSAGSAAGSGEF linker and PAmCherry (Gblock-pKD4-ssb-linker-Pamcherry) by Gibson assembly, yielding plasmid pKD3-ssb-linker-PAmCherry. A recombineering fragment was then generated by amplifying this plasmid with primers lacZ-SSB-mYpet-KI\_for and lacZ-SSB-mYpet-KI\_rev and transformed into strain MG1655 pKD46 (JEK170), then pKD46 was cured to give strain S146.

**S473:** MG1655  $\Delta$ *recG*. In this construct, *recG* was replaced with *frt-kan-frt*, leaving only the first amino acid and the last 6 amino acids of *recG*. A recombineering fragment was generated by amplifying pKD4 with primers pKD3/4-recG-KO-for and pKD3/4-recG-KO-rev and transformed into S235 (MG1655 pSIM6), then pSIM6 was cured to give strain S473.

**SCP004:** MG1655 RecG-PAmCherry. A recombineering fragment was generated by amplifying pKD4-G4S-PAmCherry with primers recG-G4S-PAmC-KI-for and recG-PAmC-KI-rev and transformed into JEK168 (MG1655 pSIM5), then pSIM5 was cured to give strain SCP004.

**SCP007:** MG1655 PriA-PAmCherry. A recombineering fragment was generated by amplifying pKD4-G4S-PAmCherry with primers priA-G4S-PAmC-KI-for and priA-PAmC-KI-rev and transformed into JEK168 (MG1655 pSIM5), then pSIM5 was cured to give strain SCP007.

**SCP008:**  $\Delta$ *lexA* PriA-PAmCherry SSB-mYPet. P1vir transduction was used to transfer the *priA-PAmCherry* allele from strain SCP007 to strain JEK762.

**SCP012:**  $\Delta$ *lexA* RecG-PAmCherry SSB-mYPet. P1vir transduction was used to transfer the *recG-PAmCherry* allele from strain SCP004 to strain JEK762.

### **Supplementary References**

1. K. A. Datsenko, B. L. Wanner, One-step inactivation of chromosomal genes in *Escherichia coli* K-12 using PCR products. *Proc. Natl. Acad. Sci. U.S.A.* **97**, 6640–6645 (2000).
2. S. K. Sharan, L. C. Thomason, S. G. Kuznetsov, D. L. Court, Recombineering: a homologous recombination-based method of genetic engineering. *Nat. Protoc.* **4**, 206–223 (2009).
3. P. P. Cherepanov, W. Wackernagel, Gene disruption in *Escherichia coli*: TcR and KmR cassettes with the option of Flp-catalyzed excision of the antibiotic-resistance determinant. *Gene* **158**, 9–14 (1995).

4. E. S. Thrall, J. E. Kath, S. Chang, J. J. Loparo, Single-molecule imaging reveals multiple pathways for the recruitment of translesion polymerases after DNA damage. *Nat. Commun.* **8**, 2170 (2017).
5. S. Chang, E. S. Thrall, L. Laureti, V. Pagès, J. J. Loparo, “Compartmentalization of the replication fork by single-stranded DNA binding protein regulates translesion synthesis” (bioRxiv, 2020) <https://doi.org/10.1101/2020.03.03.975086> (April 29, 2021).
6. A. R. Fernández de Henestrosa, *et al.*, Identification of additional genes belonging to the LexA regulon in *Escherichia coli*: Novel LexA-regulated genes in *E. coli*. *Mol. Microbiol.* **35**, 1560–1572 (2002).
7. F. V. Subach, *et al.*, Photoactivatable mCherry for high-resolution two-color fluorescence microscopy. *Nat. Methods* **6**, 153–159 (2009).
8. A. W. Nguyen, P. S. Daugherty, Evolutionary optimization of fluorescent proteins for intracellular FRET. *Nat. Biotechnol.* **23**, 355–360 (2005).
